# Supplementary material for: Identification of a staphylococcal complement inhibitor with broad host specificity in equid Staphylococcus aureus strains
Source: PubMed Central journal article supplement (PMC5868266; doi:10.1074/jbc.ra117.000599), 2018-02-05
Supplement: supp_RA117.000599_133400_1_supp_61591_p32c8c.pdf [file supp_RA117.000599_133400_1_supp_61591_p32c8c.pdf]

## Supporting information

Identification of a Staphylococcal Complement Inhibitor with broad host specificity in equid *S. aureus* strains

Nienke W.M. de Jong<sup>1\*</sup>, Manouk Vrieling<sup>1,2\*</sup>, Brandon L. Garcia<sup>3</sup>, Gerrit Koop<sup>4</sup>, Matt Brettmann<sup>3</sup>, Piet C. Aerts<sup>1</sup>, Maartje Ruyken<sup>1</sup>, Jos A. G. van Strijp<sup>1</sup>, Mark Holmes<sup>5</sup>, Ewan M. Harrison<sup>6</sup>, Brian V. Geisbrecht<sup>3#</sup> and Suzan H.M. Rooijackers<sup>1#,\$</sup>

From <sup>1</sup>Dept. of Medical Microbiology, University Medical Center Utrecht, 3584 CX Utrecht, The Netherlands;

<sup>2</sup>The Roslin Institute, University of Edinburgh, Easter Bush Campus, Midlothian EH25 9RG, UK;

<sup>3</sup>Dept. of Biochemistry & Molecular Biophysics, Kansas State University, Manhattan, KS 66506, USA;

<sup>4</sup>Dept. of Farm Animal Health, Faculty of Veterinary Medicine, Utrecht University, 3584 CL Utrecht, The Netherlands;

<sup>5</sup>Department of Veterinary Medicine, University of Cambridge, Cambridge CB3 0ES, UK;

<sup>6</sup>Department of Medicine, University of Cambridge, Addenbrooke's Hospital, Cambridge CB2 0QQ, UK

**Running title:** Identification of staphylococcal equine SCIN

<sup>\$</sup> Author to whom correspondence should be addressed: Suzan H.M. Rooijackers; E-mail [s.h.m.rooijackers@umcutrecht.nl](mailto:s.h.m.rooijackers@umcutrecht.nl); Department of Medical Microbiology, University Medical Center Utrecht and Utrecht University, Heidelberglaan 100, 3584 CX, Utrecht, the Netherlands Tel. +31 (0)887559962

**Keywords:** Complement system, Equine, Host adaptation, Immune evasion, SCIN

This file contains one Supplemental Table, as well as three Supplemental Figures and their legends

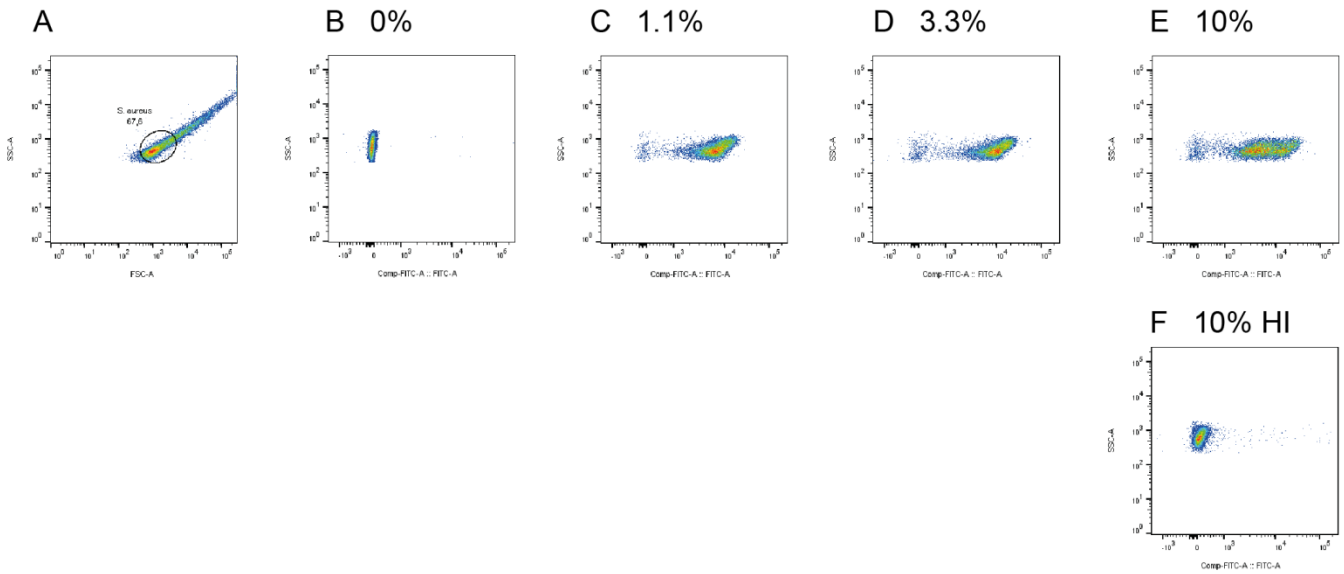

**Figure S1. Representative flow plots for C3b deposition with equine serum.** (A) Representation of gating *S. aureus* Wood in each well. (B-E) Detection of surface-bound C3b with anti-C3 conjugated with FITC and measured by flow cytometry analysis as geometric mean fluorescence of the gated bacteria after addition of various concentrations of equine serum. (F) 10% HI serum does show any C3b deposition, by the lack of FITC signal.

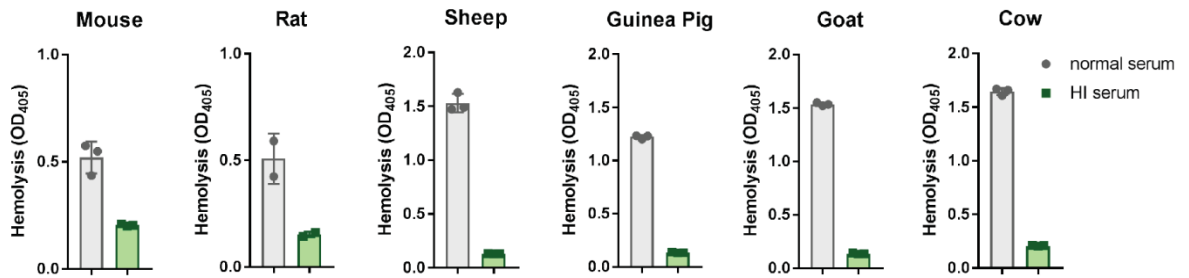

**Figure S2. HI serum lacks ability to lyse erythrocytes compared to normal serum.** The serum of the different animals used in Figure 5D were heat-inactivated and tested in the hemolysis assay. The complement in the sera of all animals lacked activity to lyse erythrocytes, while normal serum had active complement to lyse the erythrocytes.

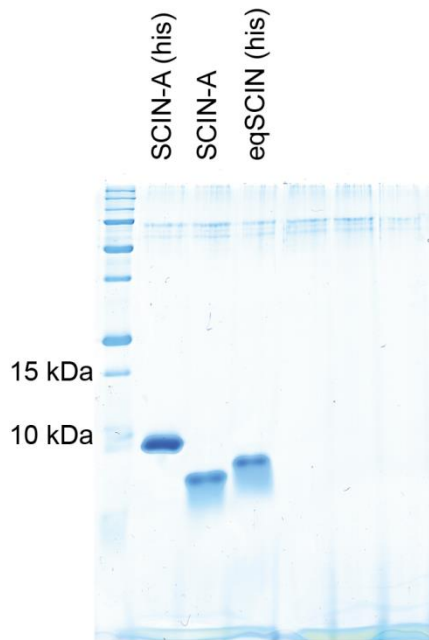

**Figure S3. Protein gel with purified proteins used in this paper.** Purified SCIN-A without his tag (lane 1) was used in the phagocytosis assay, while the his-tagged protein was used for the C3b deposition and hemolysis assay (lane 2). The protein in lane 3 is eqSCIN with non-cleavable 6xHis tag. The concentration of the proteins is 150  $\mu\text{g/ml}$ .

**Supplementary table 1:** *scn-eq* is present in *Staphylococcus aureus* strains from different clonal complexes (CC) and different countries. For *scn-eq*, the gene location (prophage/chromosome), % identity to the reference (3711), single nucleotide polymorphisms (SNPs) and insertions (INS) are indicated. Furthermore, the presence of *lukPQ* and other *scns* are reported.

| Strain ID    | CC   | Country        | Host species | Location   | <i>scn-eq</i> |                  |                   |                   |                  |                   |                   |                  |       |  | <i>lukPQ</i> |             | Reference                              |
|--------------|------|----------------|--------------|------------|---------------|------------------|-------------------|-------------------|------------------|-------------------|-------------------|------------------|-------|--|--------------|-------------|----------------------------------------|
|              |      |                |              |            | Identity (%)  | SNPs             |                   |                   |                  |                   |                   |                  | INS   |  | <i>lukP</i>  | <i>lukQ</i> |                                        |
|              |      |                |              |            |               | 75 <sup>ns</sup> | 103 <sup>ns</sup> | 157 <sup>ns</sup> | 189 <sup>s</sup> | 198 <sup>ns</sup> | 254 <sup>ns</sup> | 318 <sup>s</sup> | 87    |  |              |             |                                        |
| KM595-06     | 1    | Switzerland    | Horse        | Prophage   | 98,261        | G                | A                 | G                 | A                | C                 | G                 | T                |       |  | +            | +           | Sieber <i>et al.</i> 2011 (34)         |
| KM777-07     | 1    | Switzerland    | Horse        | Prophage   | 98,261        | G                | A                 | G                 | A                | C                 | G                 | T                |       |  | +            | +           | Sieber <i>et al.</i> 2011 (34)         |
| KM489-05     | 1    | Switzerland    | Horse        | Prophage   | 98,261        | G                | A                 | G                 | A                | C                 | G                 | T                |       |  | +            | +           | Sieber <i>et al.</i> 2011 (34)         |
| m-25-21 2.3  | 1    | United Kingdom | Cow          | Prophage   | 98,261        | G                | A                 | G                 | A                | C                 | G                 | T                |       |  | +            | +           | Koop <i>et al.</i> 2017 (14)           |
| m-25-21 2.11 | 1    | United Kingdom | Cow          | Prophage   | 98,261        | G                | A                 | G                 | A                | C                 | G                 | T                |       |  | +            | +           | Koop <i>et al.</i> 2017 (14)           |
| 8205         | 1    | United Kingdom | Horse        | Prophage   | 98,261        | G                | A                 | G                 | A                | C                 | G                 | T                |       |  | +            | +           | Koop <i>et al.</i> 2017 (14)           |
| 1928         | 1    | United Kingdom | Horse        | Prophage   | 98,261        | G                | A                 | G                 | A                | C                 | G                 | T                |       |  | +            | +           | Koop <i>et al.</i> 2017 (14)           |
| 8231         | 1    | United Kingdom | Horse        | Prophage   | 98,261        | G                | A                 | G                 | A                | C                 | G                 | T                |       |  | +            | +           | Koop <i>et al.</i> 2017 (14)           |
| 8182         | 1    | United Kingdom | Horse        | Prophage   | 98,261        | G                | A                 | G                 | A                | C                 | G                 | T                |       |  | +            | +           | Koop <i>et al.</i> 2017 (14)           |
| VetBz55B     | 133  | Brazil         | Buffalo      | Chromosome | 100           | T                | G                 | A                 | T                | G                 | A                 | T                |       |  | +            | +           | Aires-de-Sousa <i>et al.</i> 2007 (37) |
| VetBz63      | 133  | Brazil         | Buffalo      | Chromosome | 100           | T                | G                 | A                 | T                | G                 | A                 | T                |       |  | +            | +           | Aires-de-Sousa <i>et al.</i> 2007 (37) |
| c3388        | 133  | Tunisia        | Donkey       | Prophage   | 100           | T                | G                 | A                 | T                | G                 | A                 | T                |       |  | +            | +           | Gharsa <i>et al.</i> 2012 (35)         |
| c3401        | 133  | Tunisia        | Donkey       | Prophage   | 100           | T                | G                 | A                 | T                | G                 | A                 | T                |       |  | +            | +           | Gharsa <i>et al.</i> 2012 (35)         |
| c3403        | 133  | Tunisia        | Donkey       | Prophage   | 100           | T                | G                 | A                 | T                | G                 | A                 | T                |       |  | +            | +           | Gharsa <i>et al.</i> 2012 (35)         |
| c4439        | 133  | Tunisia        | Donkey       | Prophage   | 100           | T                | G                 | A                 | T                | G                 | A                 | T                |       |  | +            | +           | Gharsa <i>et al.</i> 2012 (35)         |
| c4444        | 133  | Tunisia        | Donkey       | Prophage   | 100           | T                | G                 | A                 | T                | G                 | A                 | T                |       |  | +            | +           | Gharsa <i>et al.</i> 2012 (35)         |
| c4445        | 133  | Tunisia        | Donkey       | Prophage   | 100           | T                | G                 | A                 | T                | G                 | A                 | T                |       |  | +            | +           | Gharsa <i>et al.</i> 2012 (35)         |
| c4451        | 133  | Tunisia        | Donkey       | Prophage   | 100           | T                | G                 | A                 | T                | G                 | A                 | T                |       |  | +            | +           | Gharsa <i>et al.</i> 2012 (35)         |
| c4452        | 133  | Tunisia        | Donkey       | Prophage   | 100           | T                | G                 | A                 | T                | G                 | A                 | T                |       |  | +            | +           | Gharsa <i>et al.</i> 2012 (35)         |
| c3815        | 133  | Tunisia        | Goat         | Prophage   | 100           | T                | G                 | A                 | T                | G                 | A                 | T                |       |  | +            | +           | Gharsa <i>et al.</i> 2012 (35)         |
| 7107         | 133  | United Kingdom | Horse        | Prophage   | 100           | T                | G                 | A                 | T                | G                 | A                 | T                |       |  | +            | +           | Koop <i>et al.</i> 2017 (14)           |
| 7540         | 133  | United Kingdom | Horse        | Prophage   | 100           | T                | G                 | A                 | T                | G                 | A                 | T                |       |  | +            | +           | Koop <i>et al.</i> 2017 (14)           |
| 5431         | 133  | United Kingdom | Horse        | Prophage   | 100           | T                | G                 | A                 | T                | G                 | A                 | T                |       |  | +            | +           | Koop <i>et al.</i> 2017 (14)           |
| 8401         | 133  | United Kingdom | Horse        | Prophage   | 100           | T                | G                 | A                 | T                | G                 | A                 | T                |       |  | +            | +           | Koop <i>et al.</i> 2017 (14)           |
| 3711         | 133  | United Kingdom | Horse        | Prophage   | 100           | T                | G                 | A                 | T                | G                 | A                 | T                |       |  | +            | +           | Koop <i>et al.</i> 2017 (14)           |
| 8572         | 350  | United Kingdom | Horse        | Prophage   | 98,261        | G                | A                 | G                 | A                | C                 | G                 | T                |       |  | +            | +           | Koop <i>et al.</i> 2017 (14)           |
| 3507         | 522  | United Kingdom | Horse        | Prophage   | 99,42         | T                | G                 | A                 | A                | G                 | A                 | C                |       |  | +            | +           | Koop <i>et al.</i> 2017 (14)           |
| 8571         | 522  | United Kingdom | Horse        | Prophage   | 98,261        | G                | A                 | G                 | A                | C                 | G                 | T                |       |  | +            | +           | Koop <i>et al.</i> 2017 (14)           |
| KM1549-2-06  | 1660 | Switzerland    | Horse        | Prophage   | 95,763        | G                | A                 | G                 | A                | C                 | G                 | T                | AAAGC |  | +            | +           | Sieber <i>et al.</i> 2011 (34)         |

<sup>ns</sup> = non-synonymous

<sup>s</sup> = synonymous
